# Supplementary material for: Treatment with a Nitric Oxide-Donating NSAID Alleviates Functional Muscle Ischemia in the Mouse Model of Duchenne Muscular Dystrophy
Source: PubMed Central journal article supplement (PMC3489726; doi:10.1371/journal.pone.0049350), 2012-11-05

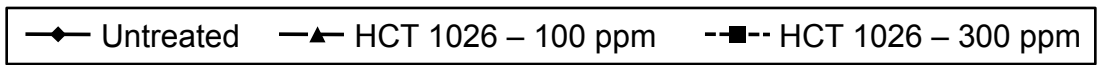

**A**

1 month

2 months

3 months

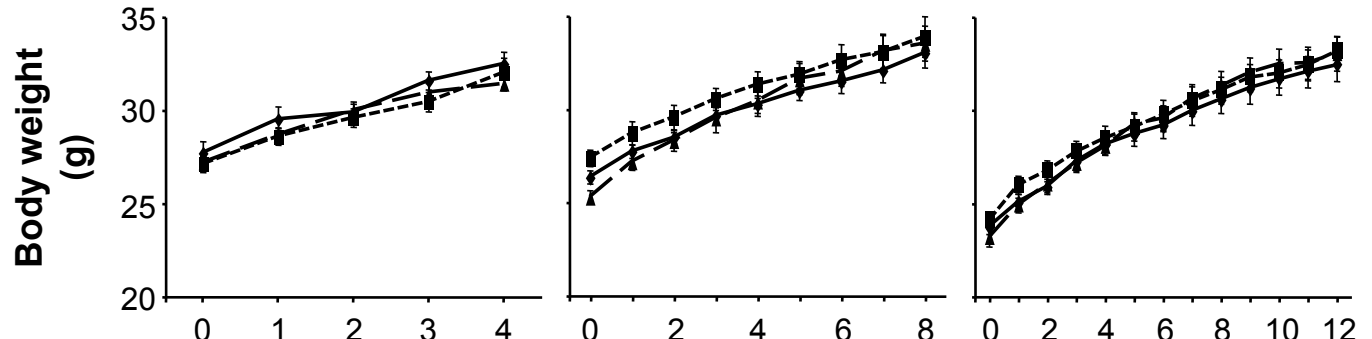

**B**

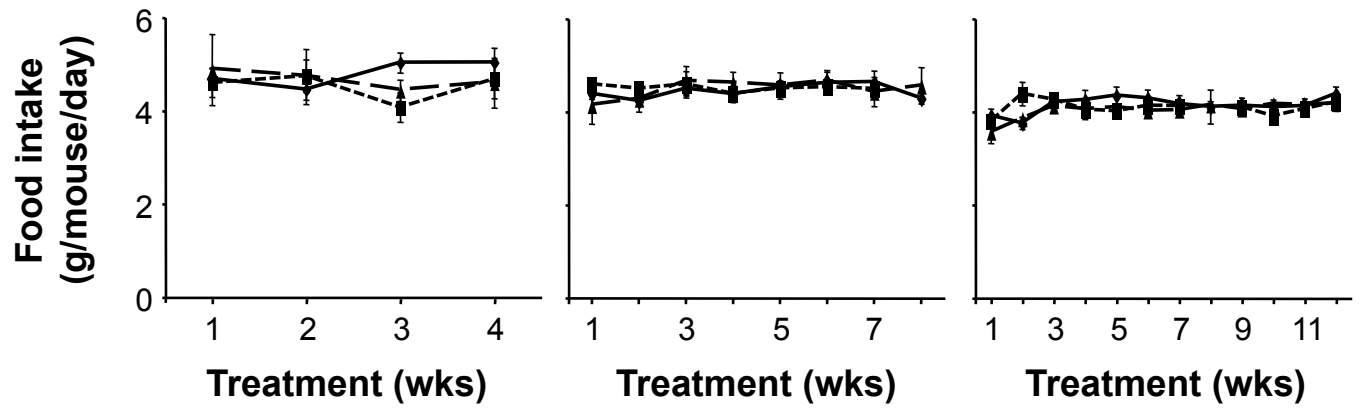

Supplement: pone.0049350.s001.pdf [file pone.0049350.s001.pdf]
